# Supplementary material
Source: PubMed Central journal article supplement (PMC3524336)
Supplement: NIHMS400974-supplement-ESI.pdf [file NIHMS400974-supplement-ESI.pdf]

**Supplementary Information For**

**Immune Stimulating Photoactive Hybrid Nanoparticles for**

**Metastatic Breast Cancer<sup>†</sup>**

**Sean Marrache,<sup>a1</sup> Joshua H. Choi,<sup>a1</sup> Smanla Tundup,<sup>c</sup> Dhillon Zaver,<sup>a</sup> Donald A. Harn,<sup>c</sup> Shanta Dhar<sup>\*ab</sup>**

<sup>a</sup>*Department of Chemistry, University of Georgia, Athens, GA 30602, USA*

<sup>b</sup>*Department of Physiology and Pharmacology, College of Veterinary Medicine, University of Georgia, Athens, GA 30602, USA*

<sup>c</sup>*Department of Infectious Diseases, College of Veterinary Medicine, University of Georgia, Athens, GA 30602, USA*

*Email: [shanta@uga.edu](mailto:shanta@uga.edu); Fax: +1 706 542-9454; Tel: +1 706 542-1012*

<sup>1</sup> *S.M. and J. H. C contributed equally to this work.*

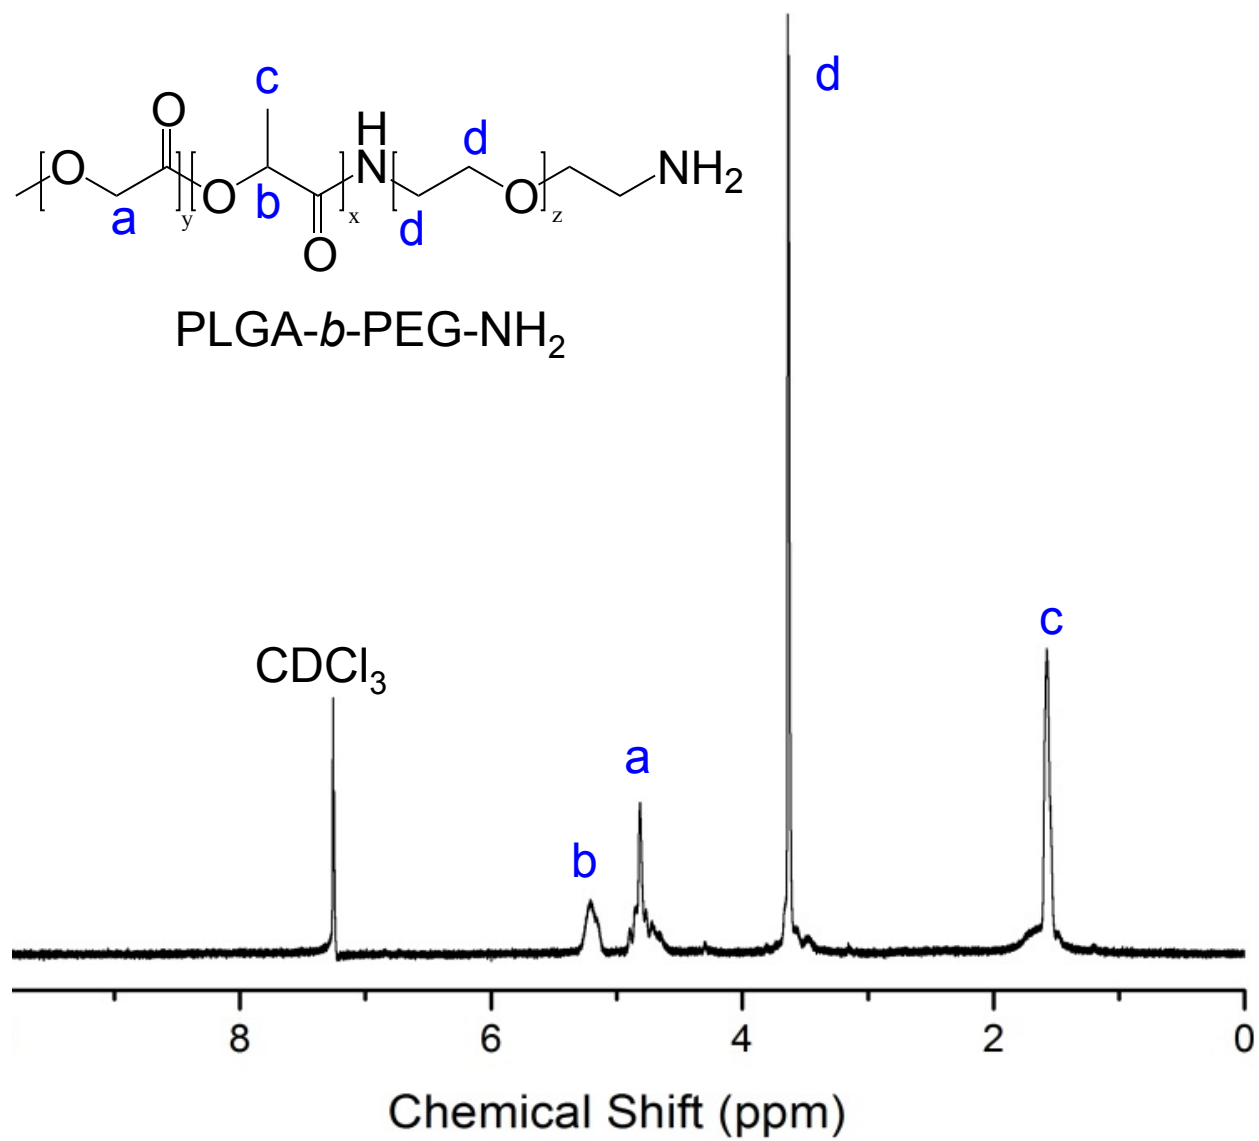

**Fig. S1.** <sup>1</sup>H NMR of PLGA-*b*-PEG-NH<sub>2</sub> in CDCl<sub>3</sub>.

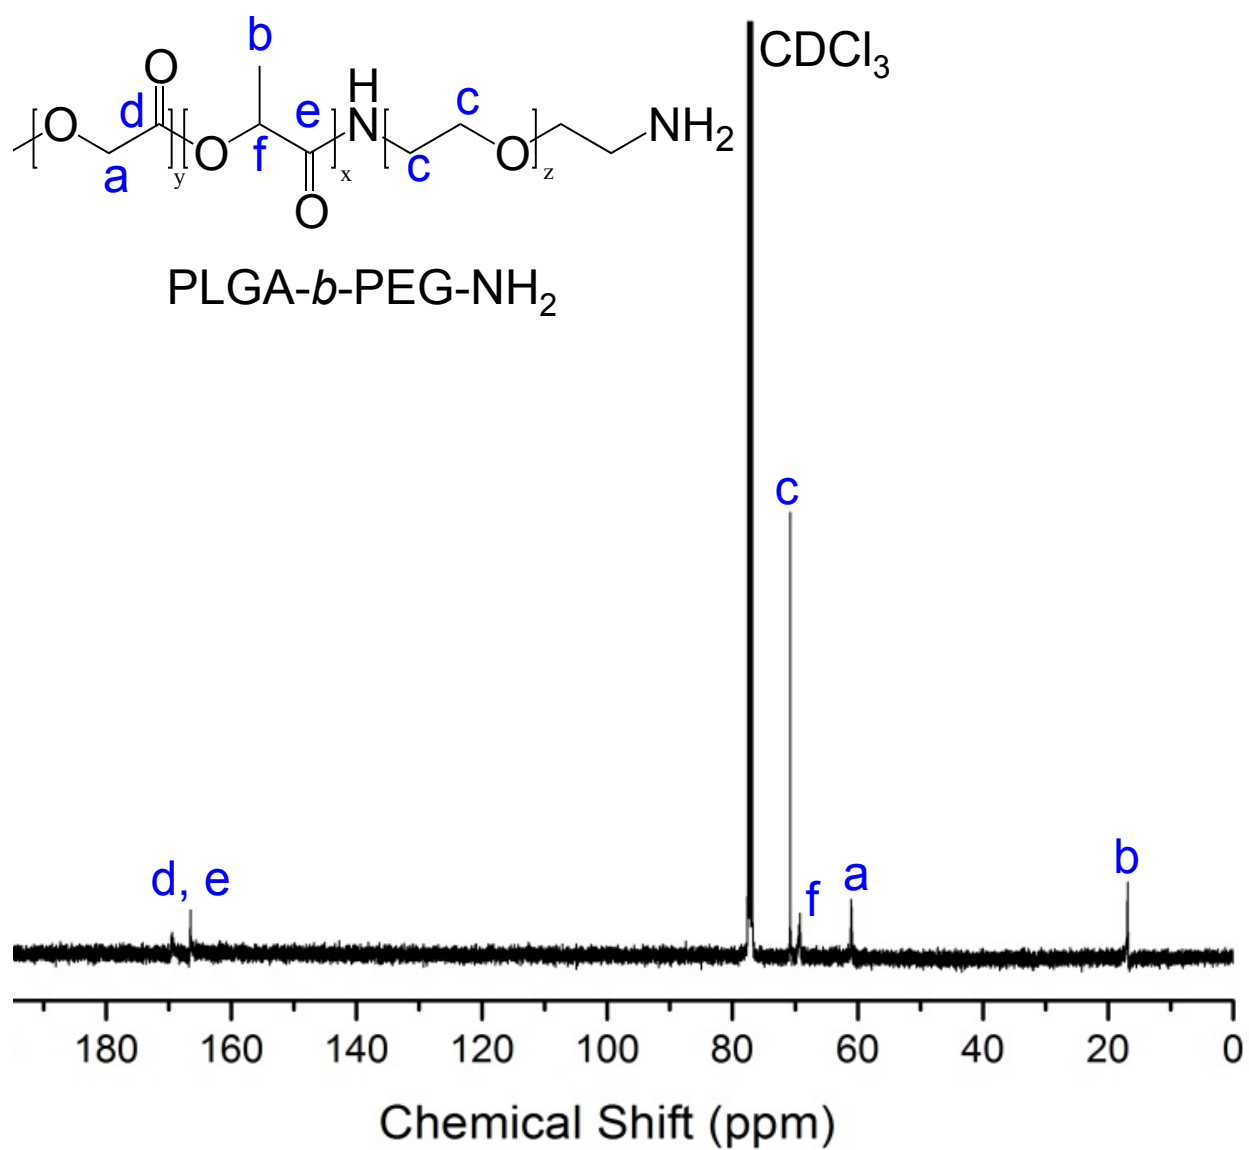

**Fig. S2.** <sup>13</sup>C NMR of PLGA-*b*-PEG-NH<sub>2</sub> in CDCl<sub>3</sub>.

**Table. S1.** Comparison of molecular weights of PLGA-COOH and PLGA-*b*-PEG-NH<sub>2</sub> as determined from gel permeation chromatographic (GPC) analyses using THF as the mobile phase and a conventional calibration curve constructed from narrow polystyrene standards at 40 °C.

| <b>Molecular Weight</b> | <b>PLGA-<i>b</i>-PEG-NH<sub>2</sub></b> | <b>PLGA-COOH</b> |
|-------------------------|-----------------------------------------|------------------|
| M <sub>w</sub>          | 8,540 g/mol                             | 6,750 g/mol      |
| M <sub>n</sub>          | 7,070 g/mol                             | 4,300 g/mol      |
| PDI                     | 1.21                                    | 1.57             |

| <b>Table S2.</b> Stability of CpG-ODN-Au-ZnPc-Poly-NPs by dynamic light scattering measurements in nanopure water. |                                   |             |                            |
|--------------------------------------------------------------------------------------------------------------------|-----------------------------------|-------------|----------------------------|
|                                                                                                                    | <b>Hydrodynamic diameter (nm)</b> | <b>PDI</b>  | <b>Zeta Potential (mV)</b> |
| Day 1                                                                                                              | 186.0 ± 4.5                       | 0.53 ± 0.07 | -10.6 ± 0.4                |
| Day 30                                                                                                             | 90.0 ± 0.4                        | 0.42 ± 0.01 | -20.5 ± 0.3                |

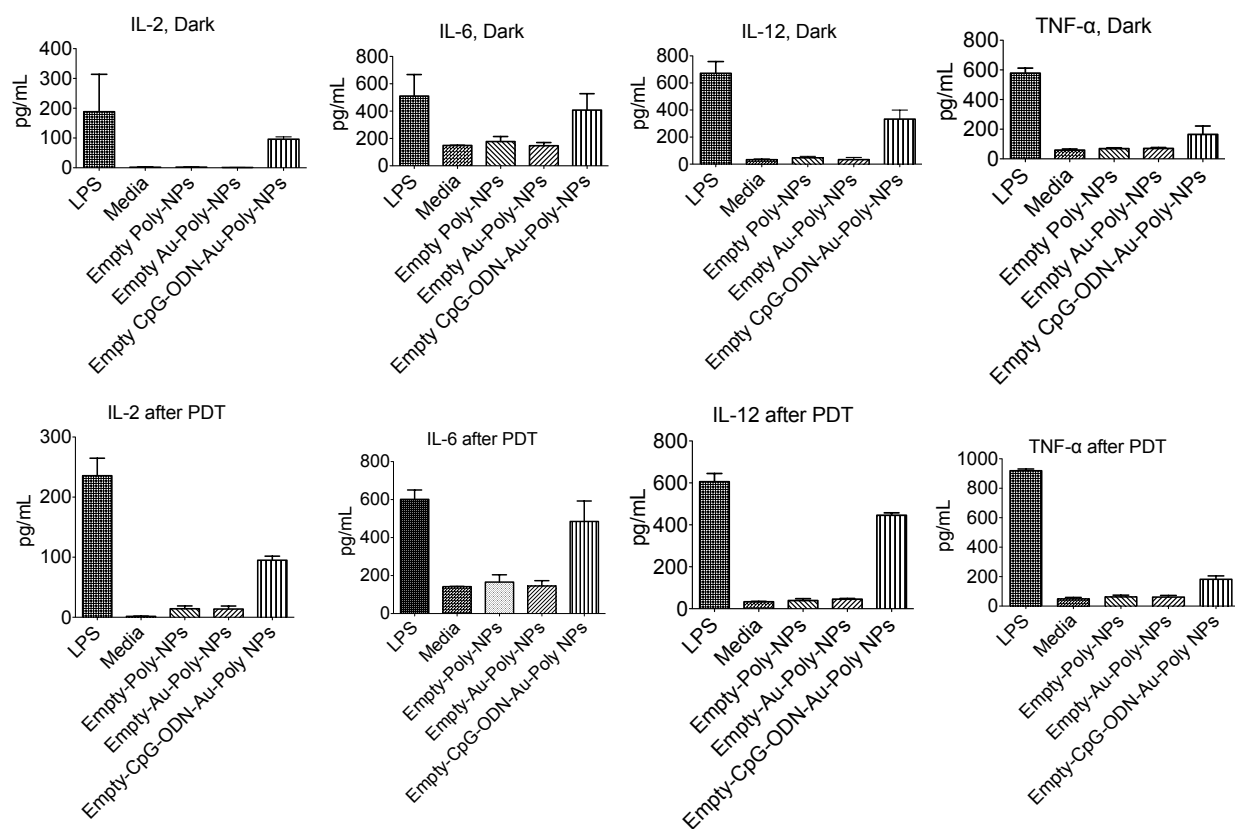

**Fig. S3.** In vitro antitumor immunity after PDT with various control NPs without encapsulated ZnPc by using ELISA.
